# Supplementary material for: Clinical relevance of PD-1 positive CD8 T-cells in gastric cancer
Source: Springer Nature journal article supplement (doi:10.1007/s10120-023-01364-7), 2023-02-12

**Supplementary Figure 3: Correspondingly high PD-1 expression by immunohistochemistry in lymphocytes in “3G” cohort samples with high *CD8A* and *PDCD1* expression levels by RNAseq (x400, a: H&E, b: PD-1)**

**Supplementary Fig 3a**

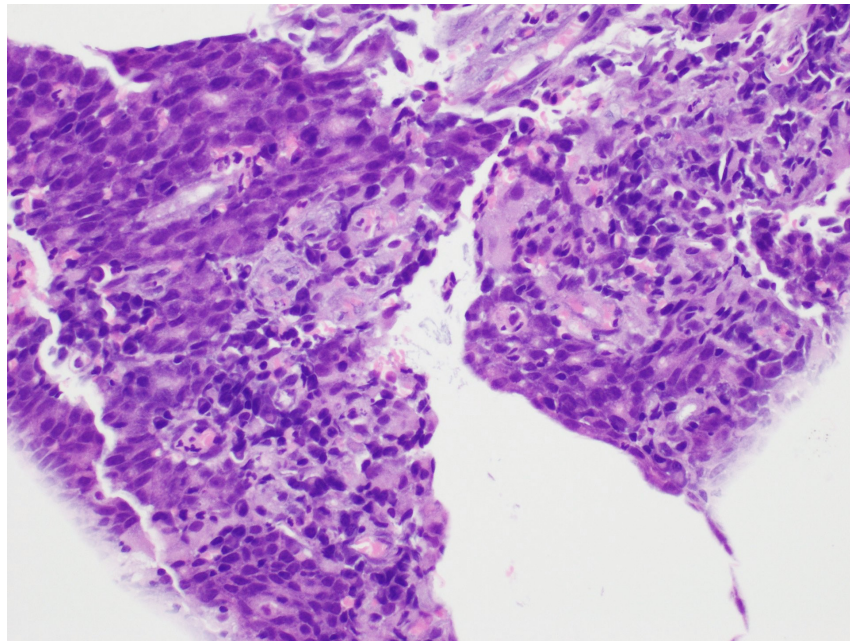

**Supplementary Fig 3b**

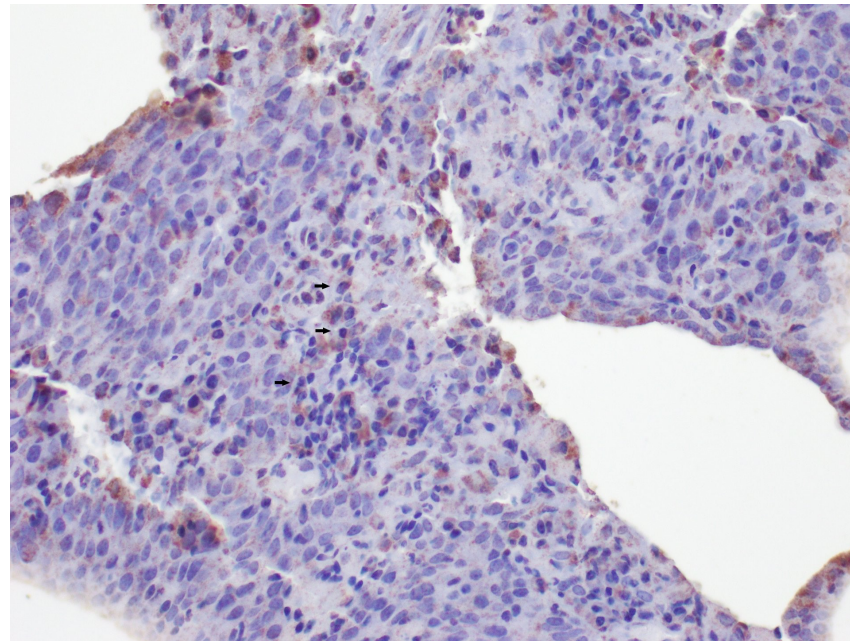

Supplement: MOESM1 [file 10120_2023_1364_MOESM1_ESM.pdf]
